# Supplementary material for: LARGE ROOT ANGLE1, encoding OsPIN2, is involved in root system architecture in rice
Source: PubMed Central journal article supplement (PMC5853395; doi:10.1093/jxb/erx427), 2017-12-22
Supplement: erx427_suppl_supplementary_figures-and-table.pdf [file erx427_suppl_supplementary_figures-and-table.pdf]

**Figure S1**

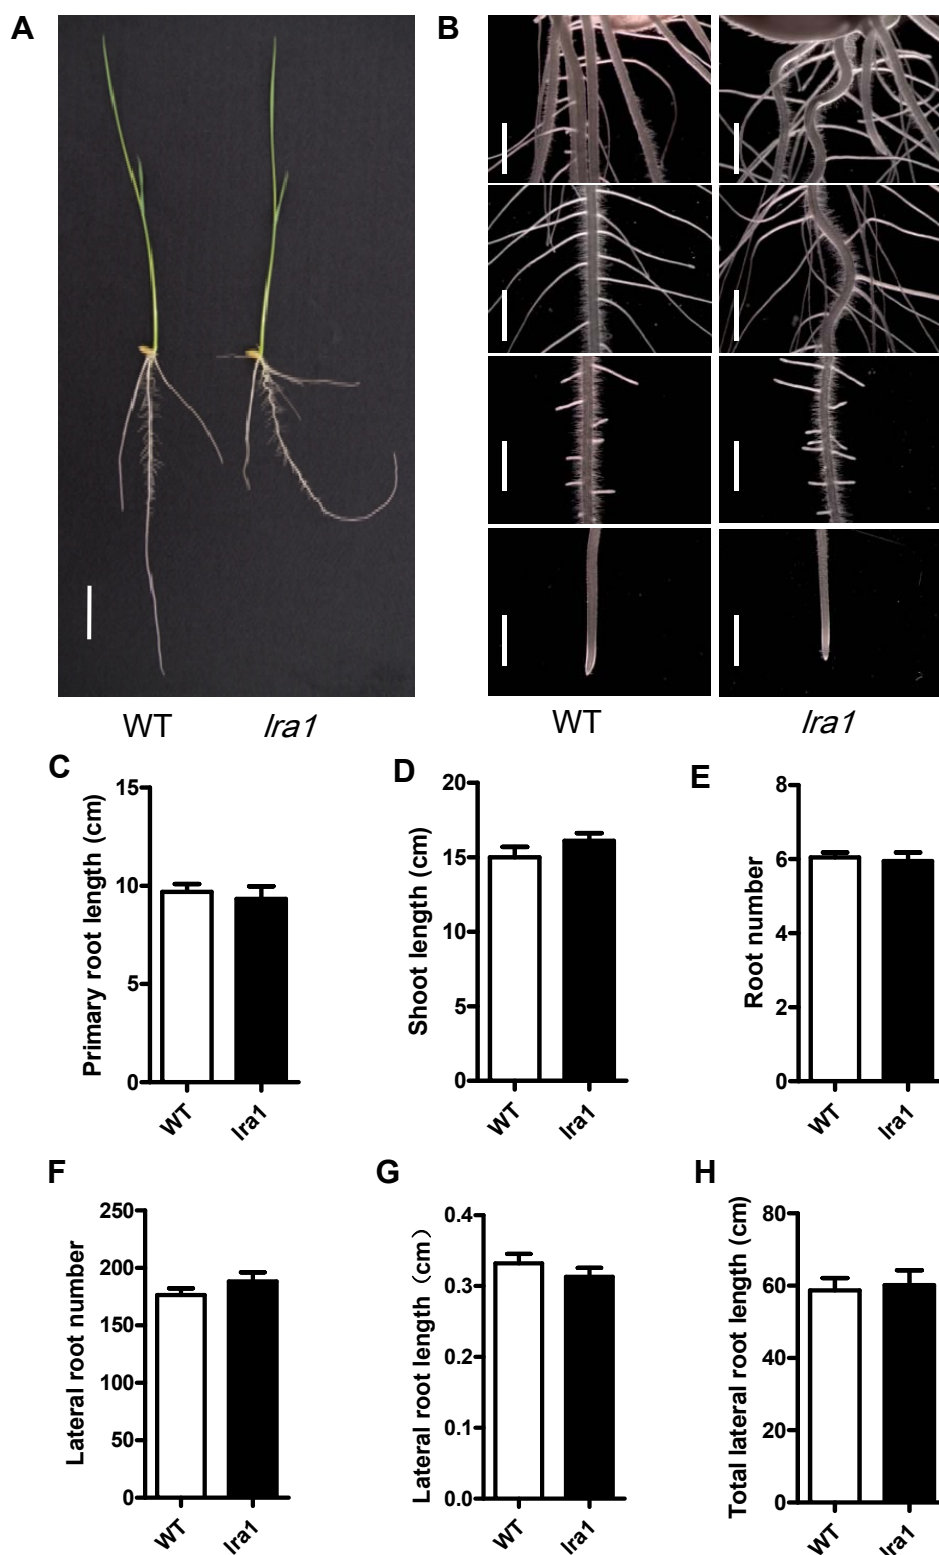

**Figure S1.** Phenotype of *lral* mutant.

(A) Phenotype of 7-d-old wild-type (WT) and *lral* grown in rice culture solution. Bar = 2 cm.

(B) Stereomicroscope images of roots of 7-d-old WT(left) and *lral*(right) grown in rice culture

solution. Scale bar = 1 mm. (C-H) The root traits of 7-d-old WT and *lral* seedlings grown in rice culture solution. Data are mean  $\pm$  SE (n=20).

**Figure S2**

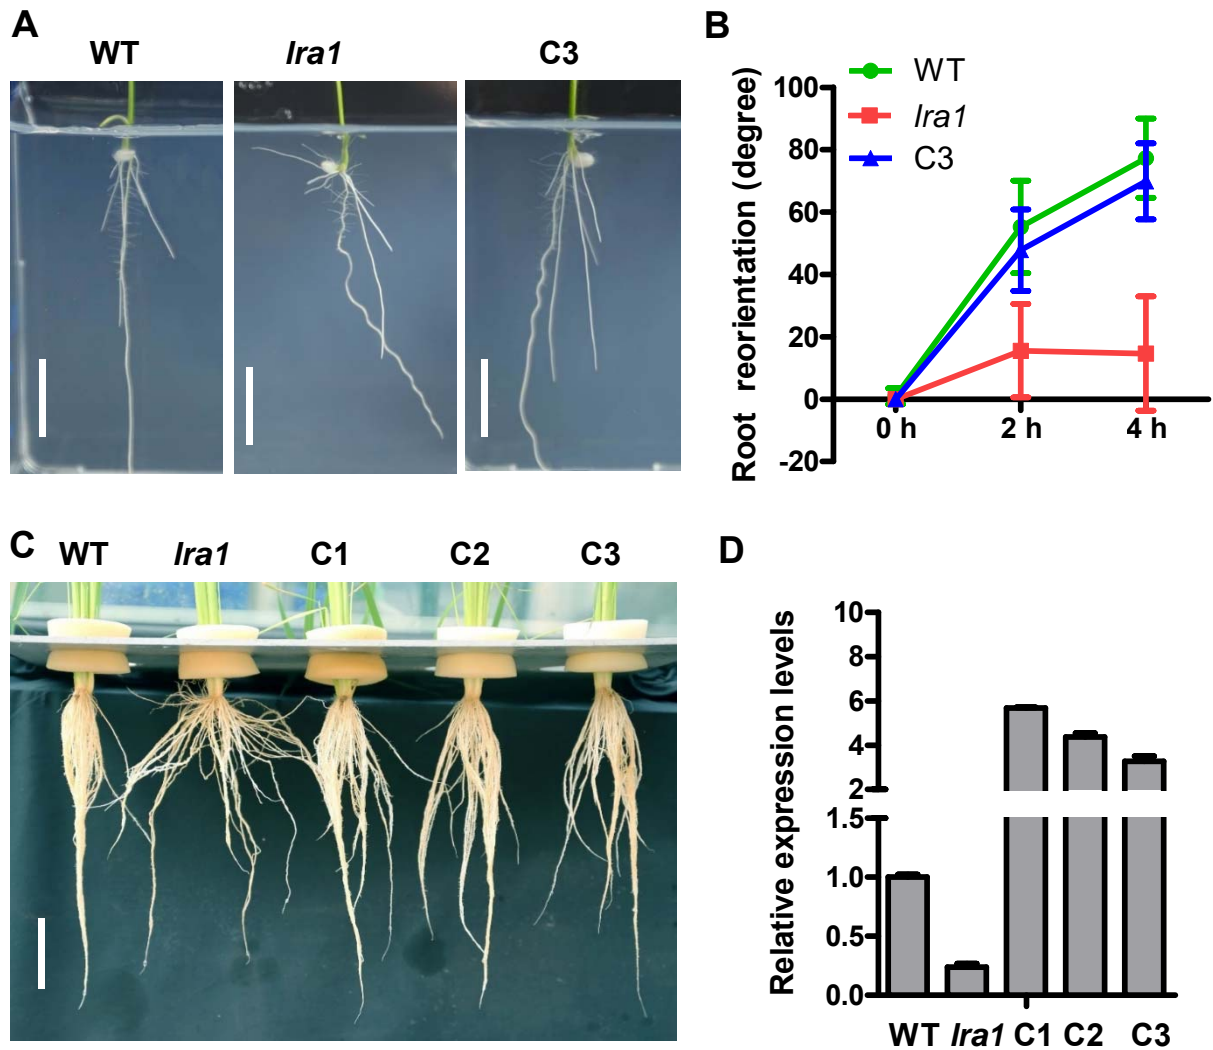

**Figure S2** Root phenotype of wild type (WT), *Ira1* mutant and complementation lines (C1-C3) in different growth medium. (A) Root phenotype of 7-d-old seedlings grown in half Murashige and Skoog (MS) solid medium. Scale bar = 2 cm. (B) Kinetics of root reorientation of 5-day-old seedlings. Seedlings were horizontally placed, and the root angle was measured at different time points. Error bars indicate standard deviations (SD), n=16. (C) Root phenotype of 4-week-old seedlings grown in solution culture. Scale bar = 5 cm. (D) Expression level of *OsPIN2* in 7-d-old WT, *Ira1* mutant and complementation lines (C1-C3).

**Figure S3**

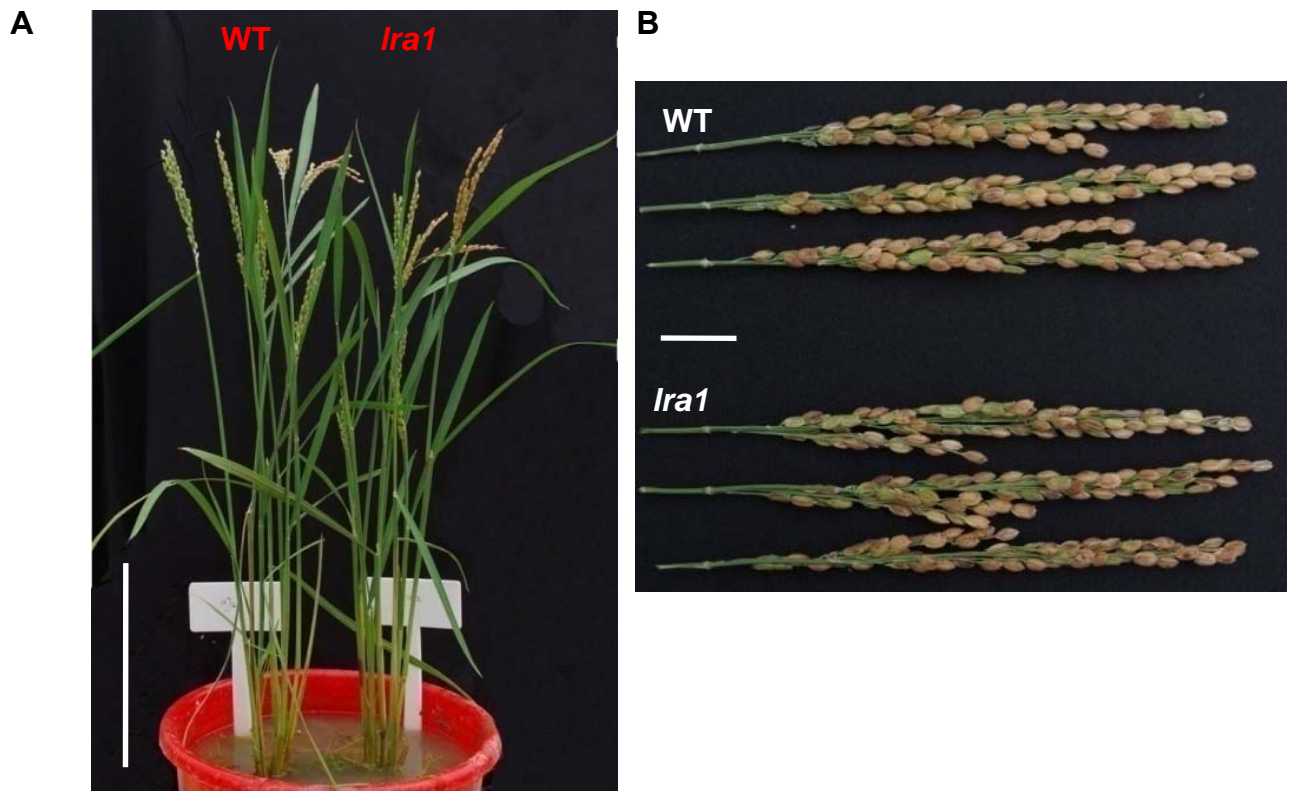

**Figure S3.** Phenotype of WT and *lra1* grown in soil pots.

(A) Phenotype of 50-d-old WT (left) and *lra1* (right). Scale bar = 20 cm

(B) The panicles of WT and *lra1*. Scale bar = 2 cm

**Figure S4**

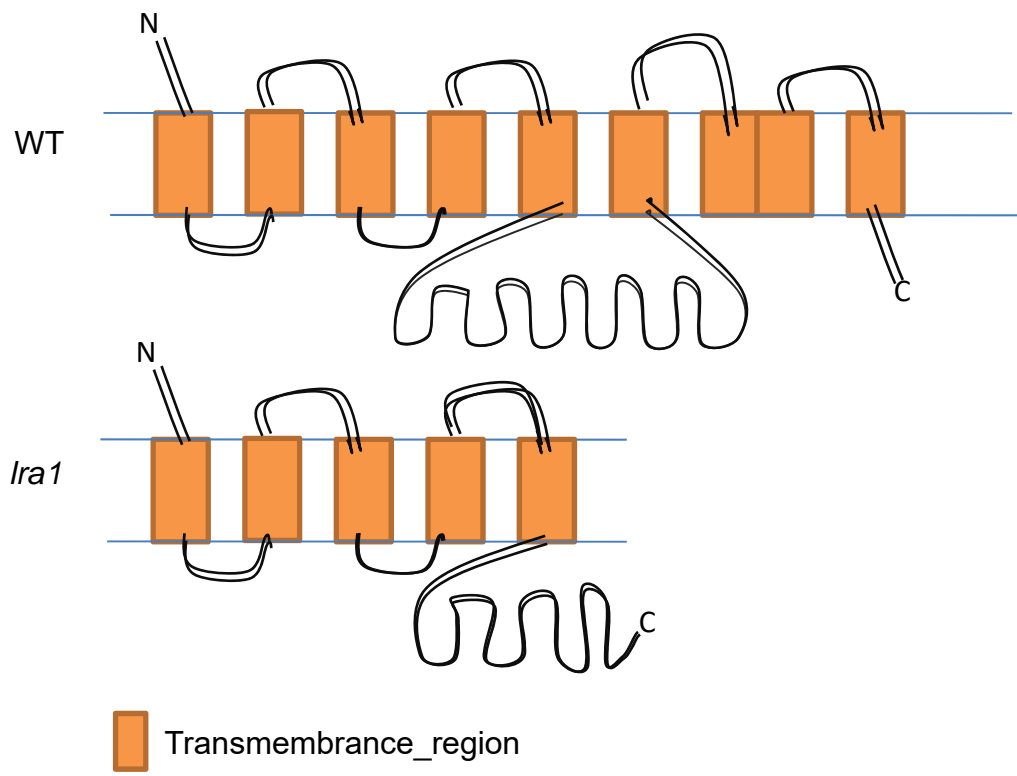

**Figure S4.** Predicted transmembrane topology models of OsPIN2 protein in WT and *lra1* mutant. InterPro (<http://www.ebi.ac.uk/interpro/search/sequence-search>) was used to predict the topology.

Figure S5

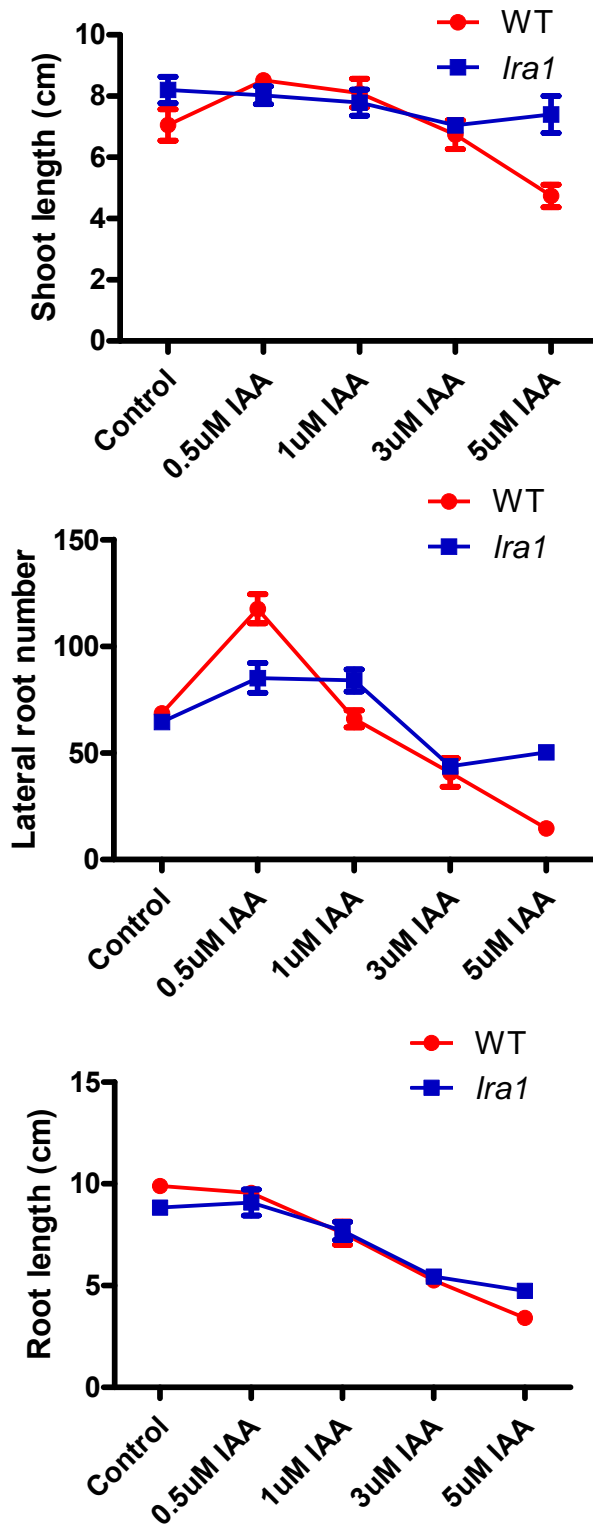

Figure S5. The phenotypic data of the WT and *lra1* seedlings treated with different concentration IAA.

**Figure S6**

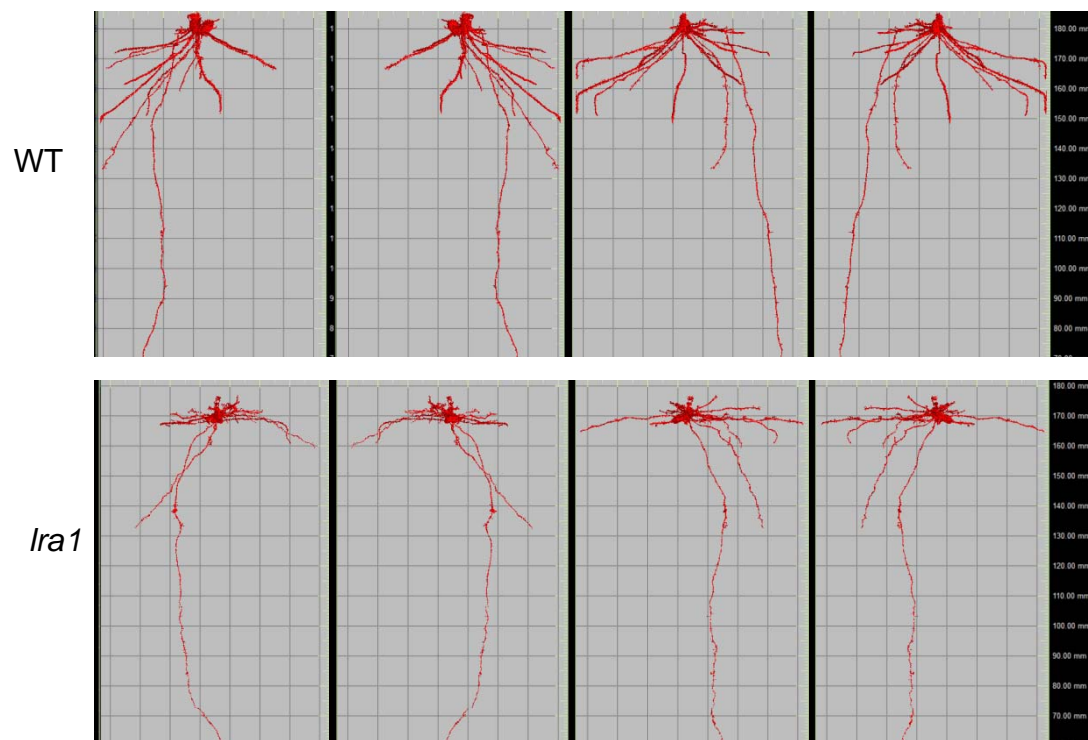

**Figure S6.** 3D visualization of rice roots segmented from soil viewed from different angles at 21 days after germination.

Figure S7

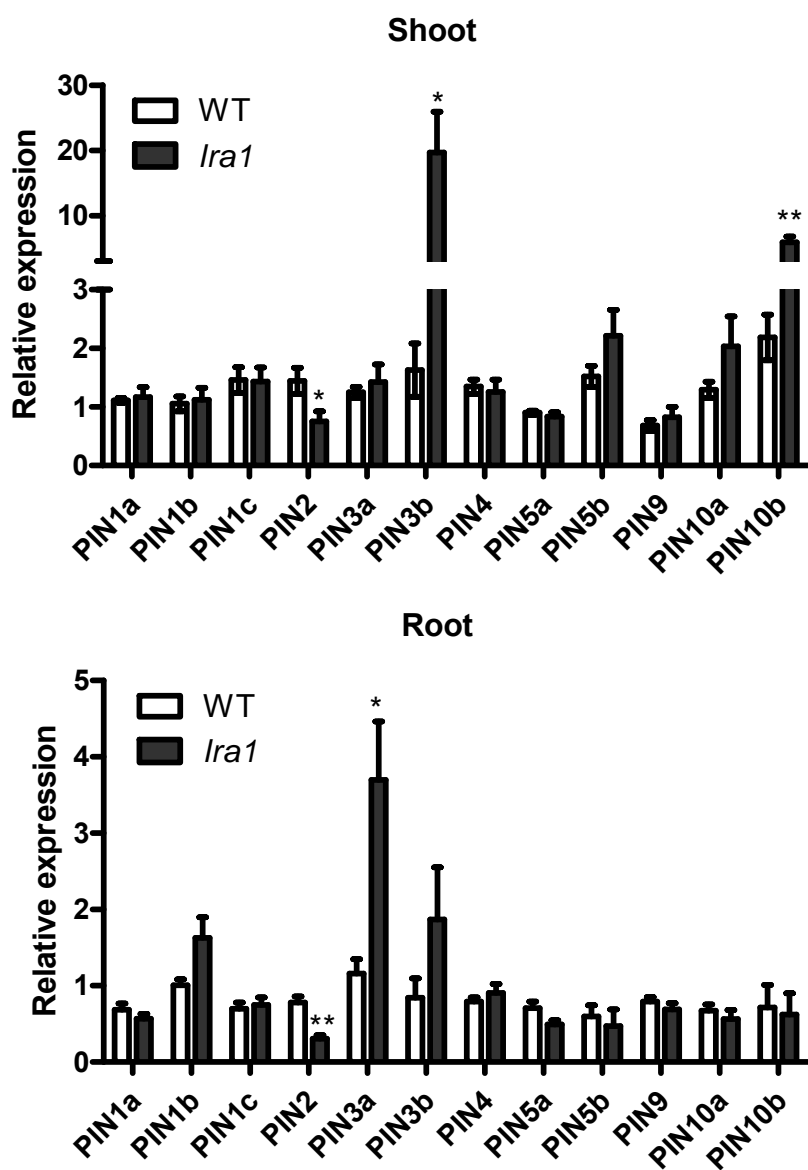

**Figure S7.** QRT-PCR analysis of PIN family genes expression in shoot and root of WT and *Ira1* mutant. Data are means  $\pm$ SE of 3 replicates, \* indicates statistical significance by Student's *t*-test (\*  $P < 0.05$ , \*\*  $P < 0.01$ ).

**Table S1.** Primers used in the study.

| Name                                                       | Sequences (5'-3')                                 |
|------------------------------------------------------------|---------------------------------------------------|
| <b>Primers for identifying the mutant point</b>            |                                                   |
| <i>OsPIN2</i> -F1                                          | GGGGCTCAAACCTCCAACCTCCAACAA                       |
| <i>OsPIN2</i> -R1                                          | TGATCAGATCGTGAACCTCAAGTGTA                        |
| Primers for CAPS                                           |                                                   |
| CAPS-F                                                     | GAGATCGAGGACGGGCTGAA                              |
| CAPS-R                                                     | GCCCTTGCCCTGAAGATGA                               |
| <b>Primers for complementation</b>                         |                                                   |
| <i>OsPIN2</i> -infusion-F1 ( <i>EcoR</i> I)                | CCATGATTACGAATTCCGTTGCTTCCCTGGACATAG              |
| <i>OsPIN2</i> -infusion-R1 ( <i>Hind</i> III)              | GGCCAGTGCCAAGCTTACGGCTGAACCTTTCATACTCA            |
| <b>Primers for subcellular localization</b>                |                                                   |
| eGFP-F( <i>Kpn</i> I)                                      | GGGGTACCATGGTGAGCAAGGGCGA                         |
| eGFP-R( <i>Bam</i> H I)                                    | CGGGATCCCTTGTACAGCTCGT                            |
| <i>OsPIN2</i> -cDNA-F( <i>Xba</i> I)                       | GCTCTAGAGGGGTGAGTGGCAGTGTCAC                      |
| <i>OsPIN2</i> -cDNA-R( <i>Sal</i> I)                       | ACGCGTCGACTCTTGCCATGCACTGTGGAAAC                  |
| <i>OsPIN2</i> -infusion-F1 ( <i>EcoR</i> I)                | CCATGATTACGAATTCCGTTGCTTCCCTGGACATAG              |
| <i>OsPIN2</i> -infusion-R2 ( <i>Kpn</i> I)                 | GCCCTTGCTCACCATGGTACCTTTGGGAGTGGCGCCGC            |
| <b>Primers for tissue expression pattern</b>               |                                                   |
| <i>proOsPIN2</i> -F( <i>Sal</i> I)                         | GCGTCGACACAAATCAGCTGCGAAACGA                      |
| <i>proOsPIN2</i> -R( <i>Bam</i> H I)                       | CGGGATCCCGCGCCGGCGACGGT                           |
| <b>Primers for identifying the function in Arabidopsis</b> |                                                   |
| <i>proAtPIN2</i> -infusion-F3 ( <i>EcoR</i> I)             | TATGACCATGATTACGAATTCCCGTGAATAGAAAG<br>AGGTA ACTG |
| <i>proAtPIN2</i> -infusion-R3 ( <i>Kpn</i> I)              | TCTAGAGGATCCCCGGGTACCTTTGATTTACTTTT<br>TCCGGC     |
| <i>OsPIN2</i> -cDNA-F ( <i>Kpn</i> I)                      | GGGGTACCATGATCACCGGACGCGACA                       |
| <i>OsPIN2</i> -cDNA-R ( <i>Kpn</i> I)                      | GGGGTACCTCCTACTTGATCTCATTTCCTATT                  |
| <b>Primers for qRT-PCR</b>                                 |                                                   |
| <i>OsACTIN</i> -RT-F                                       | CAACACCCCTGCTATGTACG                              |
| <i>OsACTIN</i> -RT-R                                       | CATCACCAGAGTCCAACACAA                             |
| <i>OsPIN1a</i> -RT-F                                       | GACGAGCGTGATGACCCG                                |
| <i>OsPIN1a</i> -RT-R                                       | ATGGCCGGCATCTCGAAGTT                              |
| <i>OsPIN1b</i> -RT-F                                       | TCAGGTTCCCTCGTGGGTC                               |
| <i>OsPIN1b</i> -RT-R                                       | ACGGCTGTGCTCAGAATG                                |
| <i>OsPIN1c</i> -RT-F                                       | ATCCGCAACCCCAACACC                                |
| <i>OsPIN1c</i> -RT-R                                       | AGCGCCATGAACAGCCCGA                               |
| <i>OsPIN2</i> -RT2-F                                       | CAACACCTACTCCAGCCTC                               |
| <i>OsPIN2</i> -RT2-R                                       | TGGACCAGTCAAGAACCTC                               |
| <i>OsPIN3a</i> -RT-F                                       | TCAATCGCCATCGGACTC                                |
| <i>OsPIN3a</i> -RT-R                                       | AAAAATTACCGCTGTGCT                                |
| <i>OsPIN3b</i> -RT-F                                       | CAGGACGAGCTAGCGAAGCT                              |
| <i>OsPIN3b</i> -RT-R                                       | GATTGGCATCGTGATGTGGA                              |
| <i>OsPIN4</i> -RT-F                                        | CCTTTGTGTTTGCCAAGGAG                              |
| <i>OsPIN4</i> -RT-R                                        | GTGATGGGGAGAGCAATCAG                              |
| <i>OsPIN5a</i> -RT-F                                       | GGGGCTGGTGCTAAAGTTC                               |
| <i>OsPIN5a</i> -RT-R                                       | GATGTGATGGATTGAGGTAGGG                            |
| <i>OsPIN5b</i> -RT-F                                       | CTGCACCTCGCCATCATA                                |
| <i>OsPIN5b</i> -RT-R                                       | ATATAACCGCCGTGCTGAG                               |



---

|                                                                 |                          |
|-----------------------------------------------------------------|--------------------------|
| <i>OsPIN9</i> -RT-F                                             | TTCTGATAGGCCCGGTTGT      |
| <i>OsPIN9</i> -RT-R                                             | CGTACACAAATGATGTCACTGC   |
| <i>OsPIN10a</i> -RT-F                                           | TGATGCTCTTCCTCTTCGAGT    |
| <i>OsPIN10a</i> -RT-R                                           | GACGTGCAGGGACACGAT       |
| <i>OsPIN10b</i> -RT-F                                           | CGAGCTAGCGAAGCTGGA       |
| <i>OsPIN10b</i> -RT-R                                           | CCTTCGTCGTCGTAGTCACC     |
| <i>AtACTIN</i> -RT-F                                            | CATCCTCCGTCTTGACCTTGC    |
| <i>AtACTIN</i> -RT-R                                            | CAAACGAGGGCTGGAACAAG     |
| <i>AtPIN2</i> -RT-F                                             | CCTTGCTTGGTCCCTTGTCT     |
| <i>AtPIN2</i> -RT-R                                             | ATCGCAAACCCTGCTACTGA     |
| <b>Primers for identifying the transgenic Arabidopsis lines</b> |                          |
| <i>AtPIN2</i> -F (At-F)                                         | TTTGTTCAAATTAACGGACCG    |
| <i>AtPIN2</i> -R (At-R)                                         | AAAAACCTAAGAGTTTTGGAAGTG |
| LBb1                                                            | GCGTGGACCGCTTGCTGCAACT   |
| <i>proAtPIN2</i> -F (At-F1)                                     | GTTTGCTCACTTTCTTCGTT     |
| <i>OsPIN2</i> -R (Os-R)                                         | CAGCGTGGACAGCGAGAAGA     |

---

**Table S2.** Sample properties and scanning settings for X-ray  $\mu$ CT.

| <b>Materials</b>                            | <b>Rice (<i>Oryza sativa</i>)</b> |
|---------------------------------------------|-----------------------------------|
| Experiment conditions                       | Pot experiment                    |
| Soil                                        | Sterilised Kettering Loam         |
| Plant age (weeks)                           | 3                                 |
| Cylinder internal diameter (cm)             | 8                                 |
| Cylinder material                           | PVC                               |
| Number of plants per cylinder               | 1                                 |
| Height of scanned part of root system (cm)  | 18                                |
| Height of analyzed part of root system (cm) | 18                                |
| Voxel size ( $\mu\text{m}$ )                | 60                                |
| Current ( $\mu\text{A}$ )                   | 180                               |
| Voltage (kV)                                | 180                               |
| Number of images per subscan                | 2160                              |
| Filtering                                   | 0.1 mm copper                     |
| Scanning time per plant (min)               | 75                                |
| Scanning parts per plant                    | 2                                 |

**Table S3.** Agronomic traits of wild type (WT) and *lra1* in solution culture (n=10)

| <b>Genotype</b>         | <b>WT</b>     | <b><i>lra1</i></b> |
|-------------------------|---------------|--------------------|
| Plant height (cm)       | 80.86 ± 9.80  | 86.07 ± 6.95       |
| Root length (cm)        | 24.46 ± 1.86  | 25.94 ± 2.63       |
| Tiller number per plant | 4.00 ± 0.65   | 3.77 ± 0.75        |
| Panicle length (cm)     | 16.87 ± 0.93  | 16.55 ± 1.20       |
| Grain weigh (g/panicle) | 1.94 ± 0.20   | 2.00 ± 0.21        |
| Seed setting rate (%)   | 0.88 ± 0.04   | 0.89 ± 0.06        |
| Grain number per plant  | 84.78 ± 12.82 | 83.59 ± 10.37      |
| Grain length (mm)       | 6.28          | 6.58               |
| Grain width (mm)        | 3.42          | 3.35               |
| Length/width            | 1.84          | 1.97               |

Data are mean ± SD.

**Table S4.** Agronomic traits of wild type (WT) and *lra1* in soil pot experiment (n=3)

| <b>Genotype</b>                   | <b>WT</b>    | <b><i>lra1</i></b> |
|-----------------------------------|--------------|--------------------|
| Plant height (cm)                 | 74.33 ± 2.52 | 63.67 ± 2.08**     |
| Total tiller number per plant     | 20.00 ± 4.24 | 23.00 ± 4.24       |
| Effective tiller number per plant | 14.50 ± 3.53 | 17.00 ± 2.82       |
| Panicle length (cm)               | 13.60 ± 0.85 | 11.56 ± 1.29       |
| Grain weigh (g/panicle)           | 1.60 ± 0.14  | 1.43 ± 0.27        |
| Seed setting rate (%)             | 0.80 ± 0.11  | 0.88 ± 0.01        |
| Grain number per plant            | 83.40 ± 9.10 | 76.25 ± 5.56       |
| Grain length (mm)                 | 6.50         | 6.18               |
| Grain width (mm)                  | 3.50         | 3.27               |
| Length/width                      | 1.86         | 1.89               |

Data are mean ± SD. The asterisk indicates statistical significance between WT and *lra1* by Student's *t*-test (\*\*, P<0.01).

**Table S5.** SNPs within OsPIN2 (LOC\_Os06g44970.1) in different rice varieties.

| SNP ID       | Chr   | Position | Major Allele | Minor Allele | Variation | Effect         | Frequency of major allele in Indica (%) | Frequency of major allele in Japonica (%) | Frequency of minor allele in Indica (%) | Frequency of minor allele in Japonica (%) |
|--------------|-------|----------|--------------|--------------|-----------|----------------|-----------------------------------------|-------------------------------------------|-----------------------------------------|-------------------------------------------|
| sf0627200245 | chr06 | 27200245 | C            | T            | C->T      | Synonymous     | 99.5                                    | 100                                       | 0.5                                     | 0                                         |
| sf0627200254 | chr06 | 27200254 | A            | C            | C->A      | Synonymous     | 98.25                                   | 0.6                                       | 1.75                                    | 99.4                                      |
| sf0627200716 | chr06 | 27200716 | C            | T            | C->T      | Synonymous     | 99.62                                   | 100                                       | 0.38                                    | 0                                         |
| sf0627201163 | chr06 | 27201163 | A            | G            | G->A      | Non-Synonymous | 98.25                                   | 0.8                                       | 1.75                                    | 99.2                                      |
| sf0627201294 | chr06 | 27201294 | G            | A            | G->A      | Synonymous     | 84.86                                   | 100                                       | 15.14                                   | 0                                         |
| sf0627201316 | chr06 | 27201316 | G            | T            | T->G      | Non-Synonymous | 98.12                                   | 0.8                                       | 1.88                                    | 99.2                                      |
| sf0627201577 | chr06 | 27201577 | T            | G            | T->G      | INTRON         | 99.62                                   | 100                                       | 0.38                                    | 0                                         |
| sf0627201597 | chr06 | 27201597 | C            | T            | C->T      | INTRON         | 99.87                                   | 100                                       | 0.13                                    | 0                                         |
| sf0627201599 | chr06 | 27201599 | T            | G            | G->T      | INTRON         | 98.12                                   | 0.6                                       | 1.88                                    | 99.4                                      |
| sf0627201725 | chr06 | 27201725 | G            | A            | G->A      | INTRON         | 99.87                                   | 99.8                                      | 0.13                                    | 0.2                                       |
| sf0627201744 | chr06 | 27201744 | T            | C            | C->T      | INTRON         | 98.25                                   | 0.8                                       | 1.75                                    | 99.2                                      |
| sf0627201768 | chr06 | 27201768 | C            | G            | G->C      | INTRON         | 98.25                                   | 0.8                                       | 1.75                                    | 99.2                                      |
| sf0627201796 | chr06 | 27201796 | G            | T            | T->G      | INTRON         | 98.12                                   | 0.8                                       | 1.88                                    | 99.2                                      |
| sf0627201808 | chr06 | 27201808 | G            | T            | T->G      | INTRON         | 98                                      | 0.8                                       | 2                                       | 99.2                                      |
| sf0627201835 | chr06 | 27201835 | T            | A            | A->T      | INTRON         | 98                                      | 0.6                                       | 2                                       | 99.4                                      |
| sf0627201891 | chr06 | 27201891 | T            | A            | T->A      | INTRON         | 20.25                                   | 99.8                                      | 79.75                                   | 0.2                                       |
| sf0627201892 | chr06 | 27201892 | A            | T            | T->A      | INTRON         | 97.87                                   | 0.6                                       | 2.13                                    | 99.4                                      |
| sf0627202559 | chr06 | 27202559 | T            | C            | C->T      | INTRON         | 98.12                                   | 0.8                                       | 1.88                                    | 99.2                                      |
| sf0627203511 | chr06 | 27203511 | A            | T            | A->T      | UTR_3_PRIME    | 99.62                                   | 100                                       | 0.38                                    | 0                                         |
| sf0627203558 | chr06 | 27203558 | G            | A            | A->G      | UTR_3_PRIME    | 98.25                                   | 0.6                                       | 1.75                                    | 99.4                                      |
| sf0627203667 | chr06 | 27203667 | C            | T            | T->C      | UTR_3_PRIME    | 98.25                                   | 0.6                                       | 1.75                                    | 99.4                                      |

The SNPs were analyzed by using RiceVarMap (<http://ricevarmap.ncpgr.cn/>). 799 Indica varieties and 497 japonica varieties were used. The two non-synonymous SNPs were shaded. Chr, Chromosome; Position, chromosome position;
